# Supplementary material for: A zebrafish high throughput screening system used for Staphylococcus epidermidis infection marker discovery
Source: PubMed Central journal article supplement (PMC3638012; doi:10.1186/1471-2164-14-255), 2013-04-15
Supplement: 1471-2164-14-255-S5.pdf [file 1471-2164-14-255-S5.pdf]

| Gene name                                                                             | Fold change |       |       |       |       |       |
|---------------------------------------------------------------------------------------|-------------|-------|-------|-------|-------|-------|
|                                                                                       | 6 HPI       | 1 DPI | 2 DPI | 3 DPI | 4 DPI | 5 DPI |
| activating transcription factor 3 ( <i>atf3</i> )                                     |             |       |       | 5.6   | 5.6   | 2.8   |
| CCAAT/enhancer binding protein (C/EBP), beta ( <i>cebpb</i> )                         |             |       |       | 4.7   | 3.8   |       |
| ceruloplasmin ( <i>cp</i> )                                                           |             |       |       | 3.2   |       | 3.2   |
| chemokine (C-X-C motif) ligand C1c ( <i>cxcl-c1c</i> )                                |             |       | 7.9   | 8.2   | 14.5  | 5.8   |
| cholesterol 25-hydroxylase ( <i>ch25h</i> )                                           |             |       |       | 5.2   | 6.7   | 3.4   |
| chromobox homolog 7a ( <i>cbx7a</i> )                                                 |             |       |       | 12.8  | 10.3  | 5.3   |
| complement component c3a ( <i>c3a</i> )                                               |             |       |       | 5.0   |       |       |
| complement component c3c ( <i>c3c</i> )                                               |             | 3.5   |       | 3.7   |       | 7.3   |
| DNA-damage regulated autophagy modulator 1 ( <i>dram1</i> )                           |             |       |       | 2.9   | 3.0   |       |
| fatty acid binding protein 11b ( <i>fabp11b</i> )                                     |             |       |       |       | -5.3  |       |
| glutathione peroxidase 1b ( <i>gpx1b</i> )                                            |             |       |       |       |       | 3.1   |
| heat shock cognate 70-kd protein, tandem duplicate 1 ( <i>hsp70.1</i> )               | 8.9         |       |       | 2.9   | 5.1   | 8.1   |
| heat shock cognate 70-kd protein, tandem duplicate 3 ( <i>hsp70.3</i> )               | 15.6        |       |       | 2.6   | 4.6   |       |
| hemopexin (HPX (1 of 2))                                                              |             |       |       | 4.6   | 11.9  | 10.1  |
| intelectin 3 ( <i>itln3</i> )                                                         |             |       |       | 10.1  | 38.2  | 19.5  |
| interferon regulatory factor 1b ( <i>irf1b</i> )                                      |             |       |       | 4.2   | 4.9   | 3.0   |
| interferon regulatory factor 7 ( <i>irf7</i> )                                        | -8.3        |       |       | 5.8   | 4.2   |       |
| interleukin 1, beta ( <i>il1b</i> )                                                   |             |       |       | 5.8   | 11.6  | 11.9  |
| interleukin 12a ( <i>il12a</i> )                                                      | 6.1         |       |       |       | 3.9   | 4.0   |
| interleukin 8 ( <i>il8</i> )                                                          |             |       |       | 3.8   | 5.9   | 3.7   |
| jun B proto-oncogene a ( <i>junba</i> )                                               | 3.1         | 2.5   |       | 2.5   |       |       |
| jun B proto-oncogene b ( <i>junbb</i> )                                               |             |       |       | 3.0   |       |       |
| lectin, galactoside-binding, soluble, 9 (galectin 9)-like 1 ( <i>lgals9l1</i> )       | -3.4        |       |       |       | 2.8   |       |
| leukocyte cell-derived chemotaxin 2 ( <i>lect2</i> (3 of 3))                          |             |       |       | 8.7   | 14.2  | 7.3   |
| leukocyte cell-derived chemotaxin 2 like ( <i>lect2l</i> )                            |             |       |       | 9.5   | 13.5  | 7.0   |
| matrix metalloproteinase 13a ( <i>mmp13a</i> )                                        |             |       |       | 7.3   | 36.9  | 7.4   |
| matrix metalloproteinase 9 ( <i>mmp9</i> )                                            |             |       |       | 20.7  | 31.5  | 5.2   |
| placenta-specific 8.2 ( <i>plac8.2</i> )                                              |             |       |       |       | 32.1  | 318.2 |
| Predicted: complement component 1, q protein 4l (C1ql protein 4l)                     |             |       |       | 5.3   | 8.9   | 8.4   |
| Predicted: growth regulated oncogene-alpha (GRO-alpha)                                |             |       |       | 5.2   | 14.4  | 4.7   |
| Predicted: LOC100149465                                                               |             |       |       | 3.6   | 11.6  | 8.2   |
| Predicted: LOC100537542                                                               |             |       |       | 4.5   |       | 3.8   |
| Predicted: LOC100705516                                                               |             |       |       | 21.4  | 20.1  | 6.6   |
| Predicted: microfibrillar-associated protein 4 (MFAP4 (4 of 13))                      |             |       |       | 11.5  | 23.7  | 21.3  |
| Predicted: saxitoxin & tetrodotoxin binding protein 2l (STX & TTX binding protein 2l) |             |       |       | 8.1   | 8.0   | 9.8   |
| prostaglandin-endoperoxide synthase 2a ( <i>ptgs2a</i> )                              |             |       |       |       | 2.2   |       |
| RIKEN cDNA 9130211I03-like                                                            |             |       |       | 7.3   | 6.1   | 4.7   |

|                                                                                      |      |      |      |      |
|--------------------------------------------------------------------------------------|------|------|------|------|
| secretory calcium-binding phosphoprotein 8 ( <i>scpp8</i> )                          |      | 6.3  | 33.3 | 14.8 |
| serum amyloid A ( <i>saa</i> )                                                       | -8.2 | 65.1 | 51.8 | 29.3 |
| solute carrier family 12 (sodium/chloride transporters), member 3 ( <i>slc12a3</i> ) |      |      | 2.7  |      |
| STEAP family member 4 ( <i>steap4</i> )                                              |      | 2.7  | 2.8  | 2.8  |
| suppressor of cytokine signaling 3a ( <i>socs3a</i> )                                |      | 4.3  | 2.5  |      |
| suppressor of cytokine signaling 3b ( <i>socs3b</i> )                                |      | 3.4  |      |      |
| tissue inhibitor of metalloproteinase 2b ( <i>timp2b</i> )                           |      | 4.2  | 9.6  | -2.5 |
| tissue inhibitor of metalloproteinase 4b ( <i>timp4b</i> )                           |      | 13.5 | 11.8 | 3.8  |
| tumor necrosis factor a ( <i>tnfa</i> )                                              |      | 35.6 | 13.6 | 12.3 |
| tumor necrosis factor b ( <i>tnfb</i> )                                              |      | 3.3  | 3.8  | 3.6  |
| tumor necrosis factor, alpha-induced protein 2b ( <i>tnfaip2b</i> )                  |      | 7.7  | 6.9  | 3.1  |
| zgc:174917                                                                           |      | 4.2  | 11.4 | 5.0  |
